# Supplementary material for: Antibiotic residue derived solid acids for ethanolysis of furfuryl alcohol into ethyl levulinate
Source: Royal Society of Chemistry journal article supplement (doi:10.1039/d3re00311f), 2023-01-01
Supplement: d3re00311f1.pdf [file d3re00311f1.pdf]

## Supporting information

### Antibiotic Residue Derived Solid Acids for Ethanolysis of Furfuryl Alcohol into Ethyl Levulinate

Haoran Yuan<sup>a,b,c,d</sup>, Chengyu Li<sup>a,b</sup>, Rui Shan<sup>a,b,c,d,e</sup>, Jun Zhang<sup>a,b,c,d,\*</sup>, Yong Chen<sup>a,b,c,d</sup>

<sup>a</sup> School of Energy Science and Engineering, University of Science and Technology of China, Guangzhou 510640, PR China

<sup>b</sup> Guangzhou Institute of Energy Conversion, Chinese Academy of Sciences (CAS), Guangzhou 510640, PR China

<sup>c</sup> CAS Key Laboratory of Renewable Energy, Guangzhou 510640, PR China

<sup>d</sup> Guangdong Provincial Key Laboratory of New and Renewable Energy Research and Development, Guangzhou 510640, PR China

<sup>e</sup> Shuye Environmental Technology Co., Ltd, Shantou 515800, PR China

Corresponding Author: \*Tel.: (+86)-20-8701-3241. Fax: (+86)-20-8701-3241. E-mail: zhangjun@ms.giec.ac.cn.

**Table S1.** Essential mesoporous information of as-prepared GR derived solid acids.

| Sample          | BET surface area  | <sup>a</sup> P.D. | <sup>b</sup> T.P.V. |
|-----------------|-------------------|-------------------|---------------------|
|                 | m <sup>2</sup> /g | nm                | cm <sup>3</sup> /g  |
| GR300-S0.25     | 51.93             | 4.32              | 0.16                |
| GR300-0.5-S0.25 | 49.31             | 3.83              | 0.14                |
| GR300-1-S0.25   | 26.94             | 3.83              | 0.098               |
| GR300-2-S0.25   | 30.04             | 30.06             | 0.17                |

<sup>a</sup> P.D., pore diameter, <sup>b</sup> T.P.V., total pore volume.

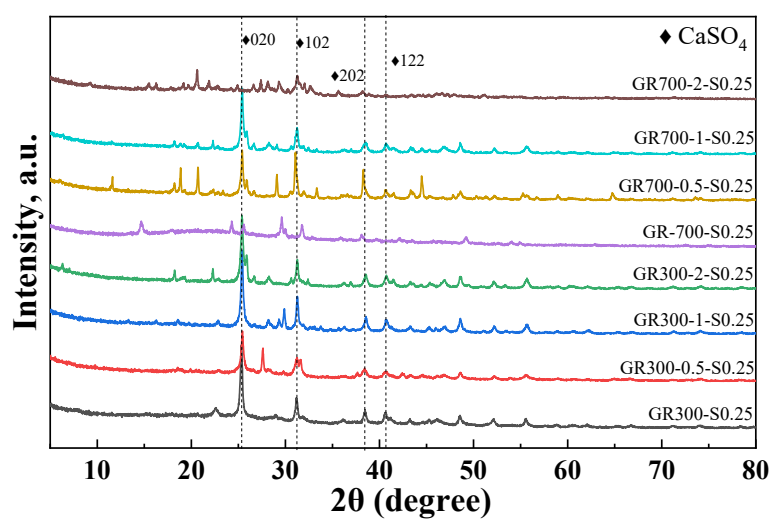

**Fig. S1.** XRD patterns of as-prepared GR derived solid acids.

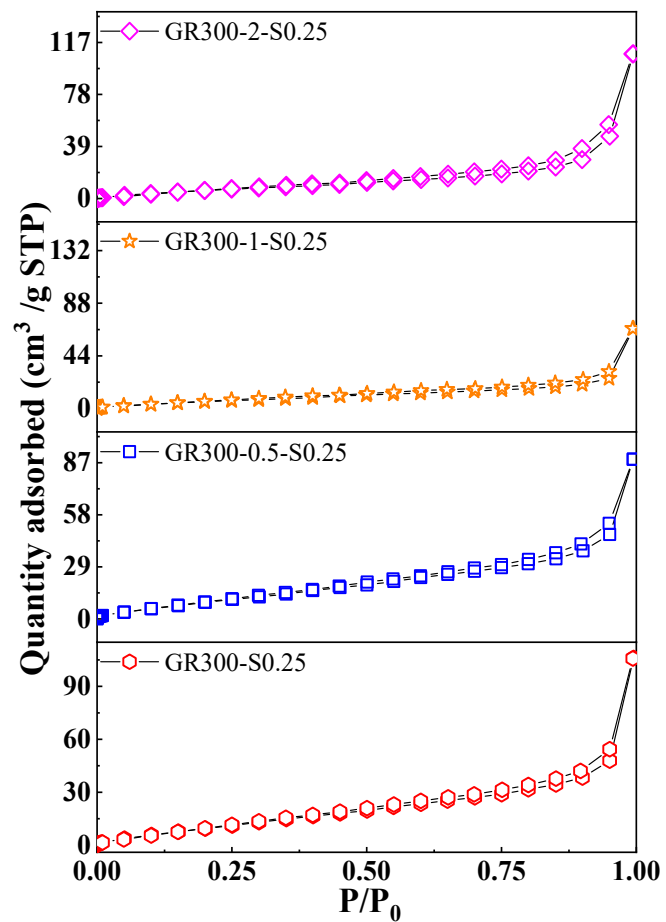

**Fig. S2.**  $\text{N}_2$  adsorption-desorption isotherms of as-prepared GR derived solid acids.

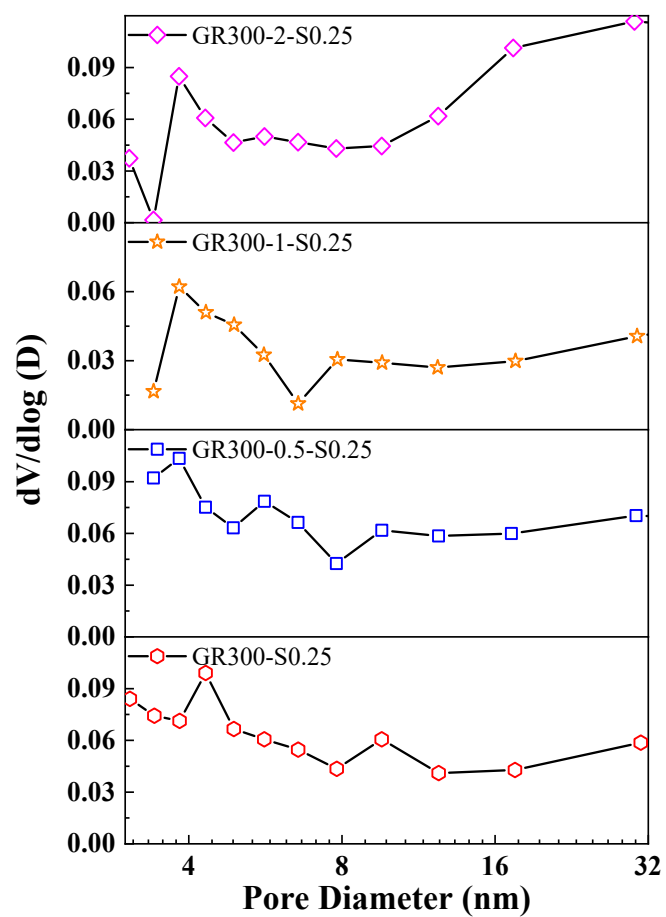

**Fig. S3.** Pore size distribution of as-prepared GR derived solid acids.

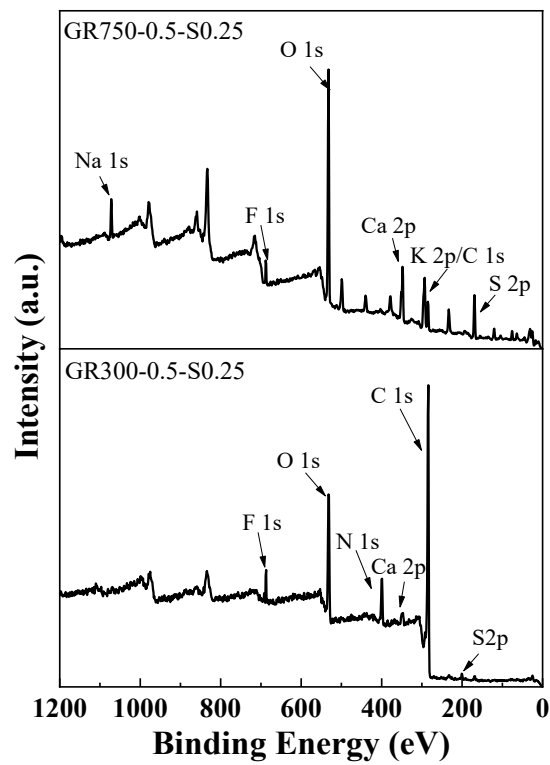

Fig. S4. XPS spectra of GR derived solid acids.

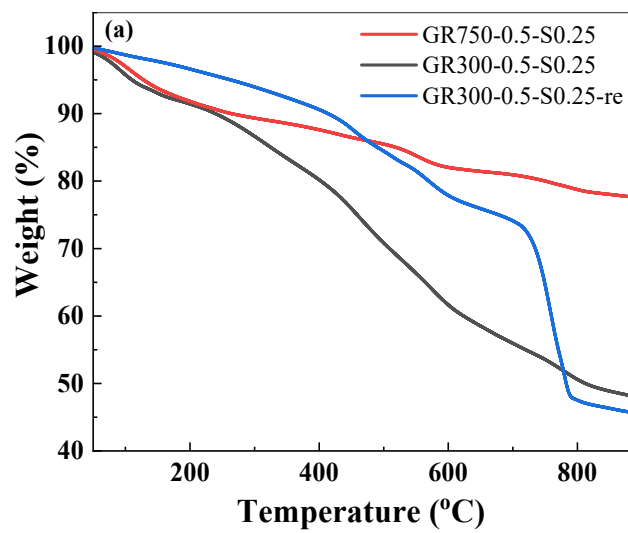

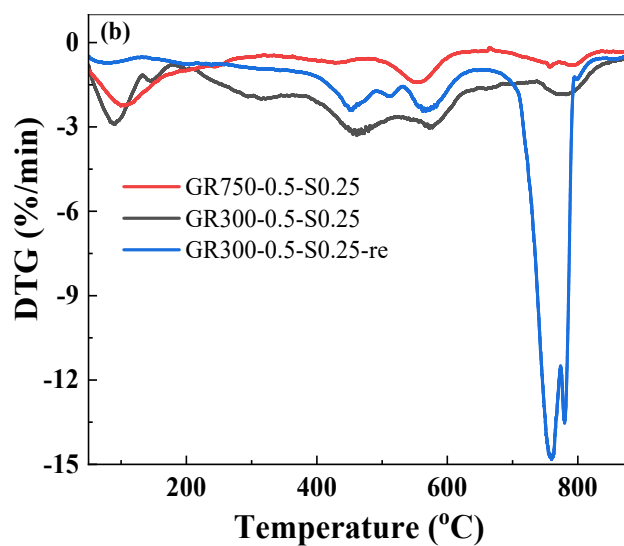

Fig. S5. TG/DTG curves of as-prepared GR derived solid acids: (a) TG; (b) DTG.

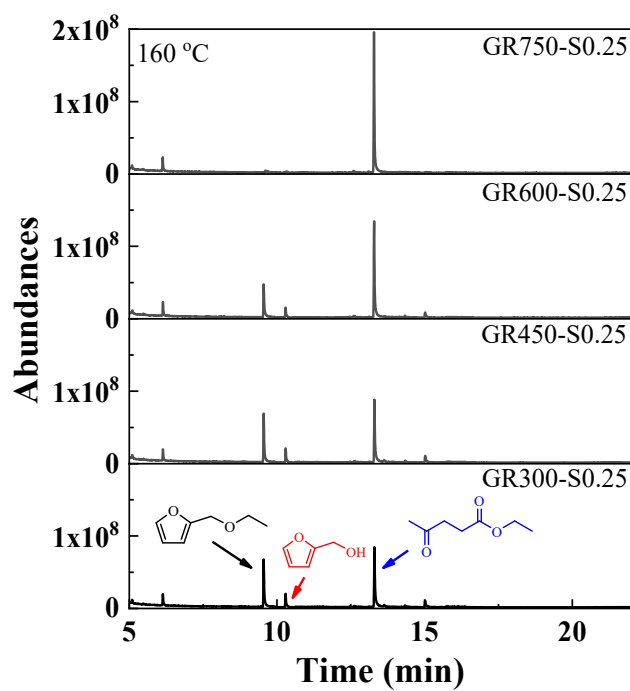

Fig. S6. GC-MS spectra for FA ethanolsis at 160 °C.

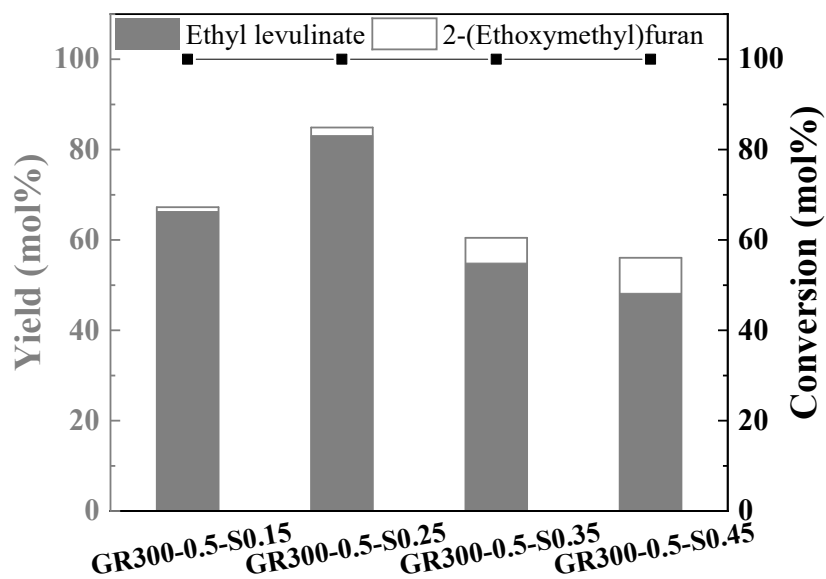

**Fig. S7.** Effect of chlorosulfonic acid dosage on FA ethanolsis. Reaction conditions:

FA (1 mmol), catalyst (20 mg), ethanol (5 mL), 160 °C, 600 rpm, 1.5 h.

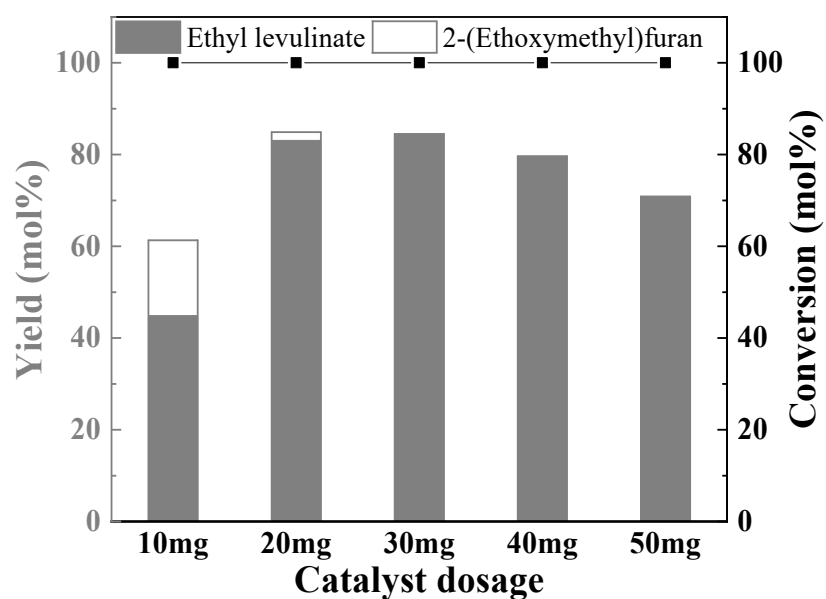

**Fig. S8.** Effect of catalyst dosage on FA ethanolsis. Reaction conditions: FA (1

mmol), GR300-0.5-S0.25, ethanol (5 mL), 160 °C, 600 rpm, 1.5 h.

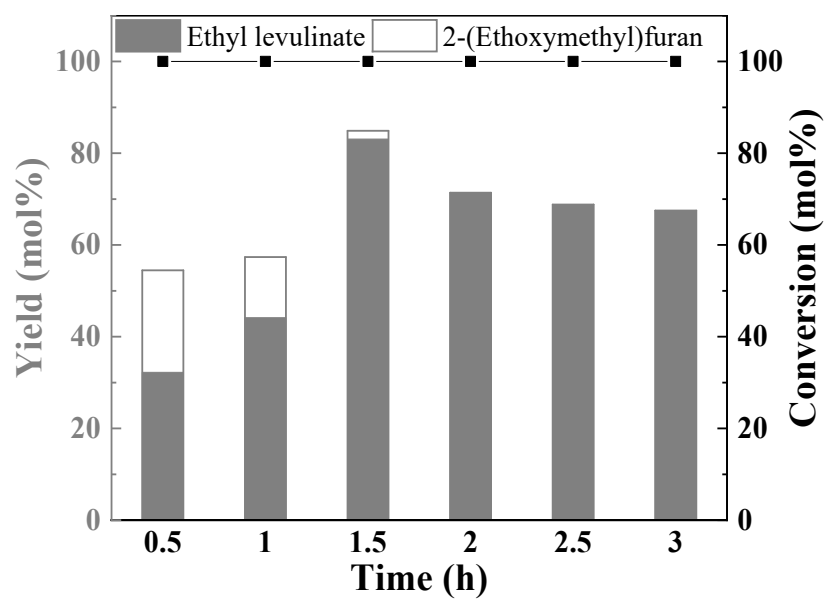

**Fig. S9.** Effect of reaction time on FA ethanolysis. Reaction conditions: FA (1 mmol), GR300-0.5-S0.25 (20 mg), ethanol (5 mL), 160 °C, 600 rpm.

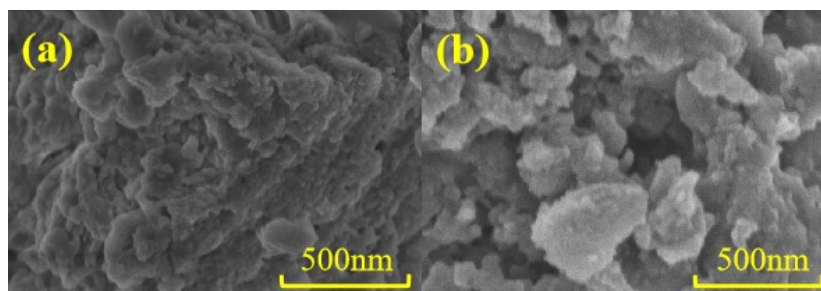

**Fig. S10.** SEM images for GR300-0.5-S0.25. (a) fresh sample; (b) reactivated sample after four cycles.
